# Supplementary material for: Chiral metal–organic framework coated quartz crystal microbalance for chiral discrimination
Source: Royal Society of Chemistry journal article supplement (doi:10.1039/c5ra01204j), 2015-01-01
Supplement: c5ra01204j1.pdf [file c5ra01204j1.pdf]

# Electronic Supporting Information (ESI) for

## Chiral metal-organic framework coated quartz crystal microbalance for chiral discrimination

Hao-Jie Duan,<sup>a</sup> Cheng-Xiong Yang<sup>\*a</sup> and Xiu-Ping Yan<sup>\*a</sup>

<sup>a</sup> College of Chemistry, Research Center for Analytical Sciences, State Key Laboratory of Medicinal Chemical Biology (Nankai University), Tianjin Key Laboratory of Molecular Recognition and Biosensing, Collaborative Innovation Center of Chemical Science and Engineering (Tianjin), Nankai University, 94 Weijin Road, Tianjin 30071, China.

### Table of Contents

|                                                                                                                                                                                             |   |
|---------------------------------------------------------------------------------------------------------------------------------------------------------------------------------------------|---|
| 1. Characterization of $Zn_2(bdc)(L-lac)(dmf)\cdot DMF$ .....                                                                                                                               | 2 |
| 2. <b>Fig. S1</b> Structures of four pairs of enantiomers .....                                                                                                                             | 3 |
| 3. <b>Fig. S2</b> Adsorption and desorption curve monitored continuously for the adsorption of 0.5 $\mu$ L <i>S</i> -1-Phenylethylamine and desorption with pure nitrogen at 30 °C<br>..... | 4 |
| 4. <b>Fig. S3</b> Dimensions of four pairs of enantiomers .....                                                                                                                             | 5 |
| 5. <b>Fig. S4</b> Cavity size of $Zn_2(bdc)(L-lac)(dmf)\cdot DMF$ .....                                                                                                                     | 5 |
| 6. <b>Fig. S5</b> The steric hindrance when <i>S</i> and <i>R</i> enantiomer interact with $Zn_2(bdc)(L-lac)(dmf)\cdot DMF$<br>.....                                                        | 6 |
| 7. <b>Fig. S6</b> A homemade PTFE crystal-holder to limit the thin coating of $Zn_2(bdc)(L-lac)(dmf)\cdot DMF$ to the gold surface of the QCM crystal .....                                 | 6 |

---

\* Corresponding authors. Tel/Fax: (86)-22-23506075  
E-mail: cxyang@nankai.edu.cn; xpyan@nankai.edu.cn

### **Characterization of $\text{Zn}_2(\text{bdc})(\text{L-lac})(\text{dmf})\cdot\text{DMF}$**

The X-ray diffraction (XRD) pattern of  $\text{Zn}_2(\text{bdc})(\text{L-lac})(\text{dmf})\cdot\text{DMF}$  was recorded with a D/max-2500 diffractometer (Rigaku, Japan) using  $\text{Cu}_{\text{K}\alpha}$  radiation ( $\lambda=1.5418 \text{ \AA}$ ). XRD data collected over the angular range from  $3$  to  $80^\circ 2\theta$  with a step  $0.02^\circ$ . Thermogravimetric analysis (TGA) of  $\text{Zn}_2(\text{bdc})(\text{L-lac})(\text{dmf})\cdot\text{DMF}$  was performed on a PTC-10A thermal gravimetric analyzer (Rigaku, Japan) from room temperature to  $700 \text{ }^\circ\text{C}$  at a ramp rate of  $10 \text{ }^\circ\text{C min}^{-1}$ . The surface area, pore volume, and pore size distributions of  $\text{Zn}_2(\text{bdc})(\text{L-lac})(\text{dmf})\cdot\text{DMF}$  was measured by  $\text{N}_2$  adsorption-desorption isotherms on a NOVA 2000e surface area and pore size analyzer (Quantachrome, USA) at  $77 \text{ K}$ . About  $0.1113 \text{ g}$  of  $\text{Zn}_2(\text{bdc})(\text{L-lac})(\text{dmf})\cdot\text{DMF}$  was used and was thoroughly out-gassed at  $150 \text{ }^\circ\text{C}$  for  $12 \text{ h}$ . The relative pressures used for calculating BET surface area was  $0.1\text{-}0.3$  for  $\text{Zn}_2(\text{bdc})(\text{L-lac})(\text{dmf})\cdot\text{DMF}$ . The prepared  $\text{Zn}_2(\text{bdc})(\text{L-lac})(\text{dmf})\cdot\text{DMF}$  gave a BET surface area of  $377.5 \text{ m}^2 \text{ g}^{-1}$  with a pore volume of  $0.22 \text{ cm}^3 \text{ g}^{-1}$ . The morphology of  $\text{Zn}_2(\text{bdc})(\text{L-lac})(\text{dmf})\cdot\text{DMF}$  coating was characterized on a QUANTA 200 scanning electron microscope (SEM) (FEI, Hillsboro, Oregon).

**Structures of four pairs of enantiomers**

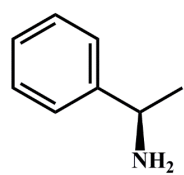

**R-1-Phenylethylamine**

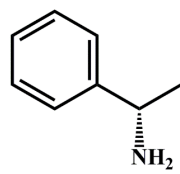

**S-1-Phenylethylamine**

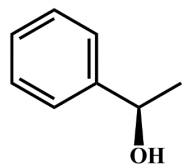

**R-1-Phenylethanol**

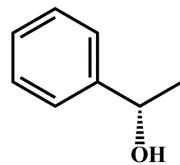

**S-1-Phenylethanol**

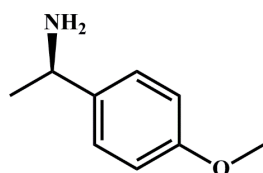

**R-1-(4-Methoxyphenyl)ethylamine**

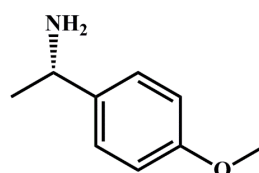

**S-1-(4-Methoxyphenyl)ethylamine**

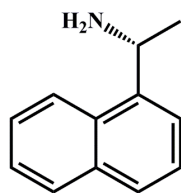

**R-1-(1-Naphthyl)ethylamine**

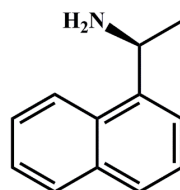

**S-1-(1-Naphthyl)ethylamine**

**Fig. S1** Structures of four pairs of enantiomers.

### Reversibility of the adsorption of enantiomers on $\text{Zn}_2(\text{bdc})(\text{L-lac})(\text{dmf})\cdot\text{DMF}$

The changes of the frequency with time were continuously monitored by exposing to the enantiomers and then purging with pure nitrogen gas. The results show that the adsorption-desorption process was reversible for four pairs of enantiomers. Detail information for the adsorption and desorption for S-1-Phenylethylamine is shown Fig. S2.

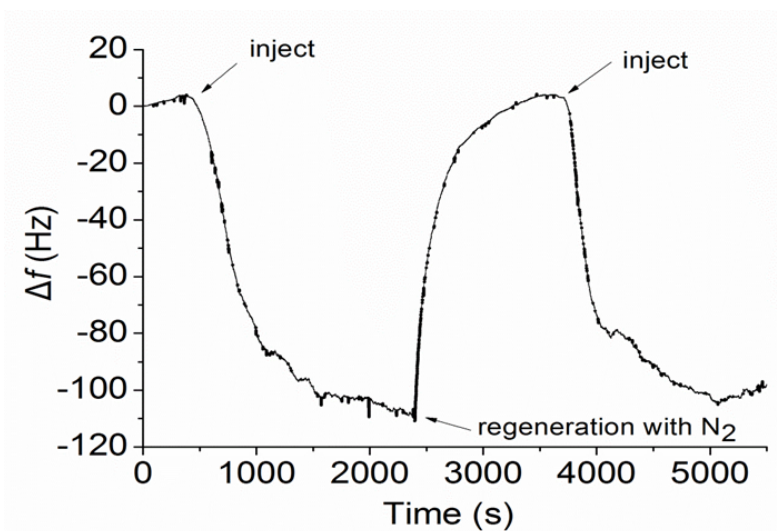

**Fig. S2** Adsorption and desorption curve monitored continuously for the adsorption of 0.5  $\mu\text{L}$  S-1-Phenylethylamine and desorption with pure nitrogen at 30 °C.

### Dimensions of four pairs of enantiomers

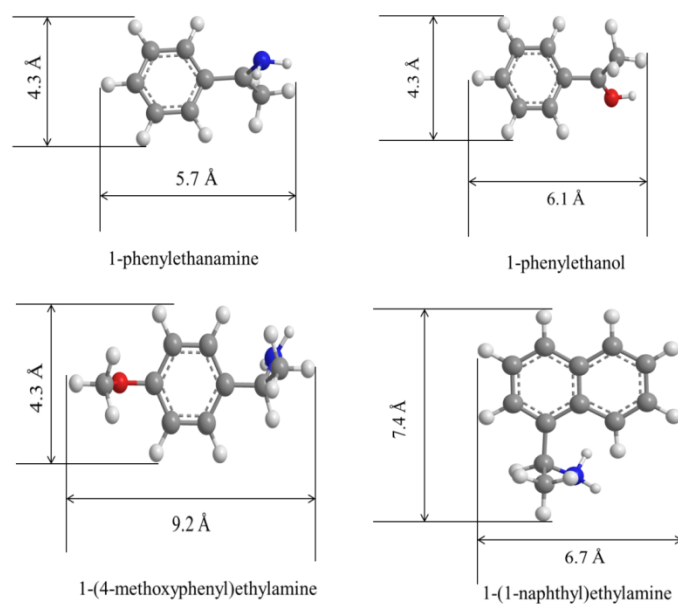

**Fig. S3** Dimensions of four pairs of enantiomers calculated with chem-3D. (C gray; O red; N blue; H white.)

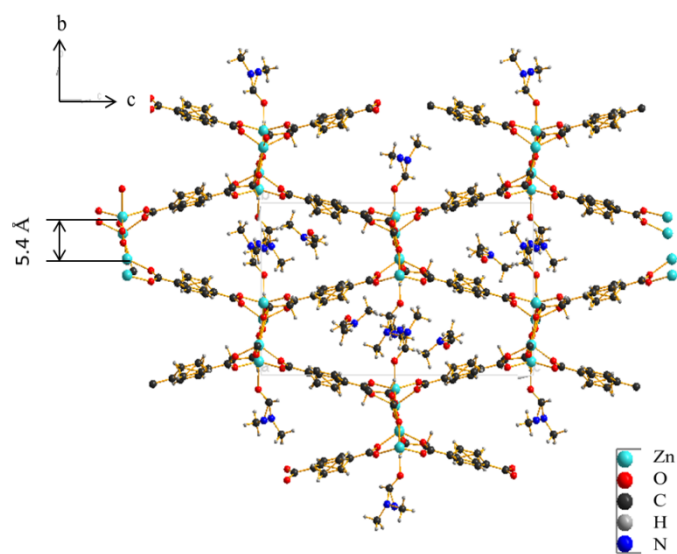

**Fig. S4** Cavity size of  $\text{Zn}_2(\text{bdc})(\text{L-lac})(\text{dmf})\cdot\text{DMF}$  calculated by the software named “Diamond”.

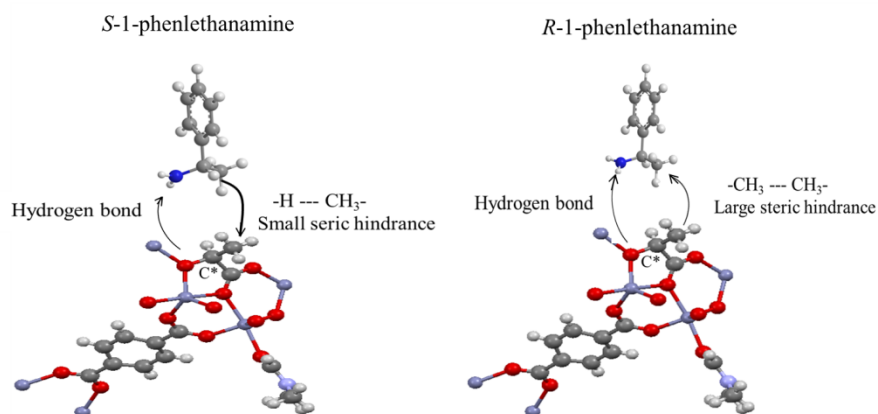

**Fig. S5** The steric hindrance when *S* and *R* enantiomer interact with  $\text{Zn}_2(\text{bdc})(\text{L-lac})(\text{dmf})\cdot\text{DMF}$  (The same situation for four pairs of enantiomers) (C gray; O red; N blue; H white; C\* chiral carbon.)

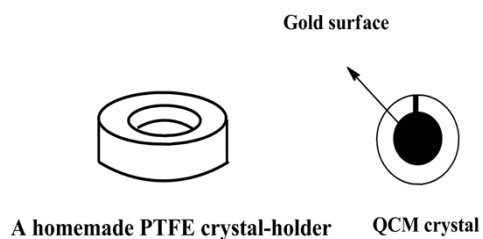

**Fig. S6** A homemade PTFE crystal-holder to limit the thin coating of  $\text{Zn}_2(\text{bdc})(\text{L-lac})(\text{dmf})\cdot\text{DMF}$  to the gold surface of the QCM crystal.
